# Supplementary material for: Human iPSC model reveals a central role for NOX4 and oxidative stress in Duchenne cardiomyopathy
Source: PubMed Central journal article supplement — Stem Cell Reports. 2022 Jan 27;17(2):352–68. doi: 10.1016/j.stemcr.2021.12.019 (PMC8828550; doi:10.1016/j.stemcr.2021.12.019), 2022-01-27
Supplement: mmc1.pdf [file mmc1.pdf]

**Stem Cell Reports, Volume 17**

**Supplemental Information**

**Human iPSC model reveals a central role for NOX4 and oxidative stress  
in Duchenne cardiomyopathy**

**Robin Duelen, Domiziana Costamagna, Guillaume Gilbert, Liesbeth De Waele, Nathalie Goemans, Kaat Desloovere, Catherine M. Verfaillie, Karin R. Sipido, Gunnar M. Buyse, and Maurilio Sampaolesi**

1 SUPPLEMENTAL INFORMATION (Duelen et al.)

2

3 SUPPLEMENTAL ITEMS (FIGURES AND TABLES)

4

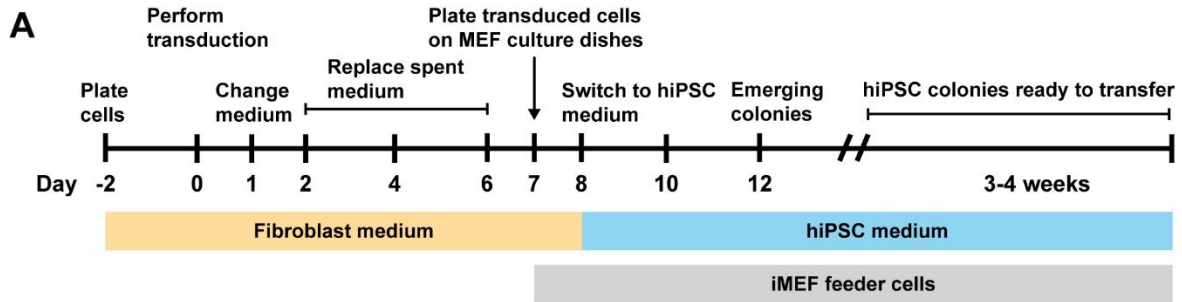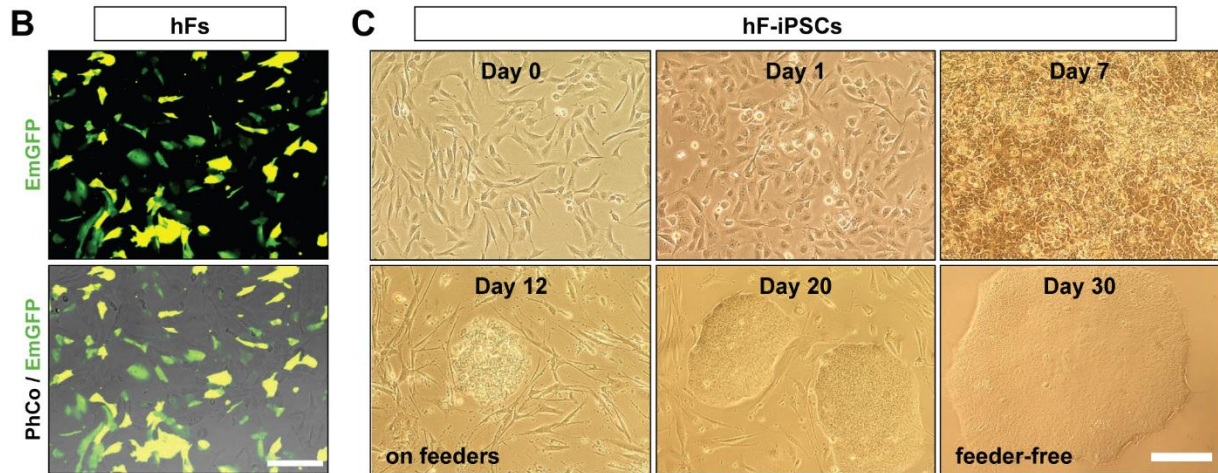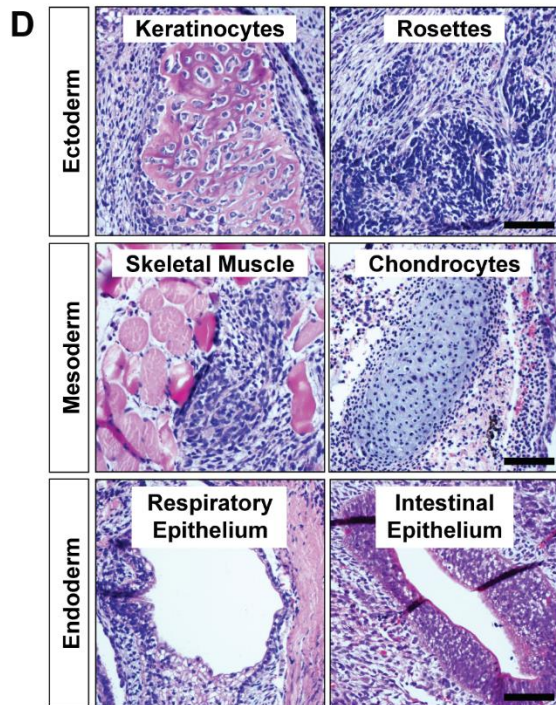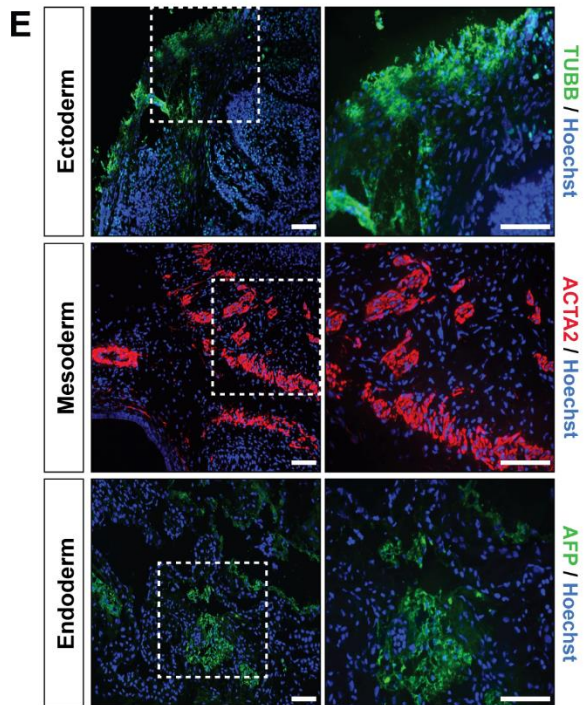

5

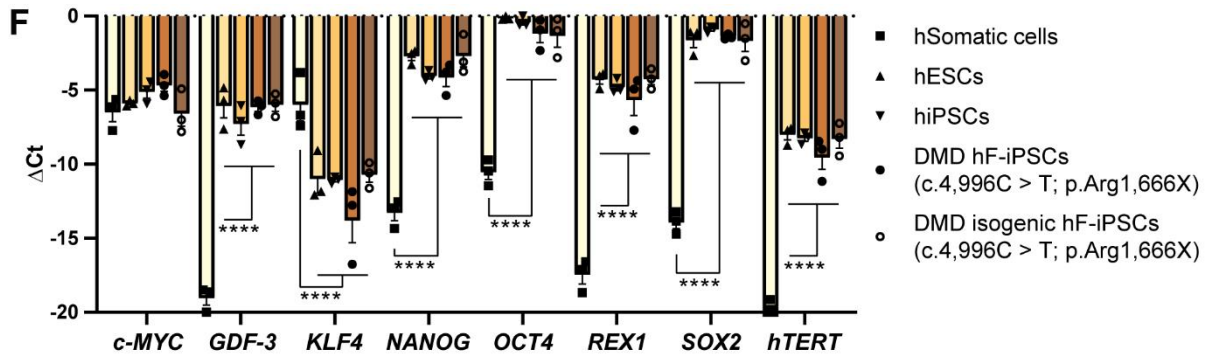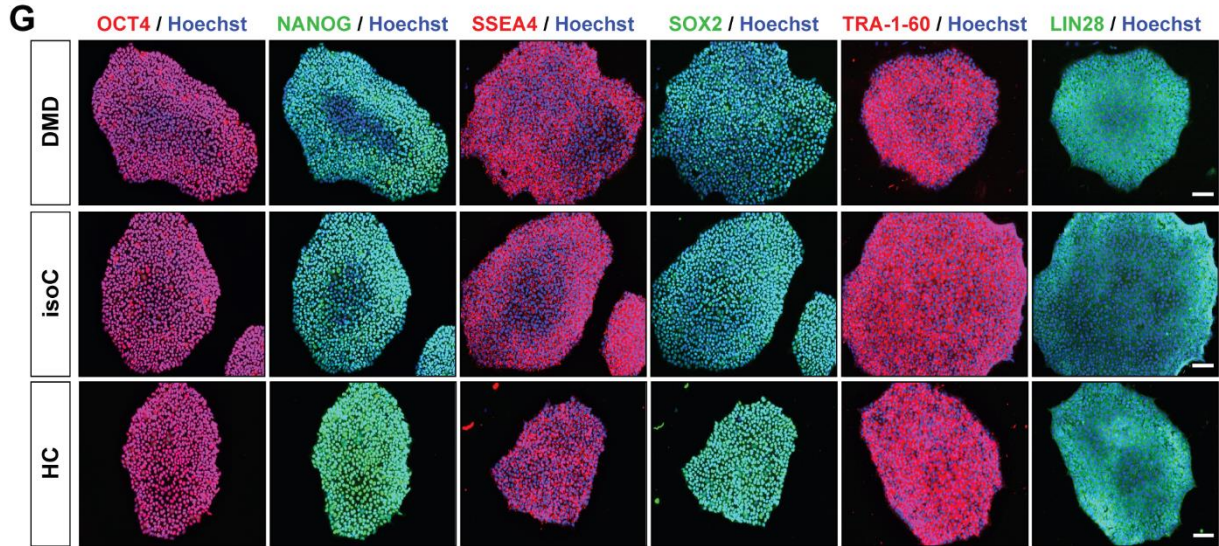

6  
7  
8 **Fig. S1: Characterization of the SeV-mediated reprogrammed DMD patient hF-iPSC clones,**  
9 **harboring the nonsense mutation in exon 35 (c.4,996C > T; p.Arg1,666X) of the *Dystrophin* gene,**  
10 **and its CRISPR-Cas9 corrected DMD isogenic control line. (A)** Schematic representation of the SeV  
11 hiPSC reprogramming protocol for hFs (data not shown for hPBMCs). hFs were transduced at day 0  
12 using the integration-free SeV vectors, expressing the OSKM (OCT3/4, SOX2, KLF4 and c-MYC)  
13 pluripotency markers. (B) EmGFP (green) expression of transduced DMD somatic cells, 1 day after  
14 transduction with SeV reprogramming vectors. (C) Morphological progression of DMD hFs towards  
15 hiPSC clones. (D) Hematoxylin and eosin staining on SeV-reprogrammed hiPSC-induced *in vivo*  
16 teratomas showing the derivatives of the three developmental germ layers, including keratinocytes and  
17 rosettes (ectoderm), skeletal muscle fibers and chondrocytes (mesoderm), and epithelium from  
18 respiratory and intestinal tract (endoderm). (E) Immunostaining of three germ lineage markers: Beta  
19 Tubulin (TUBB; ectoderm), Alpha Smooth Muscle Actin (ACTA2; mesoderm) and Alpha Fetoprotein  
20 (AFP; endoderm). Scale bar = 100  $\mu\text{m}$ . The pluripotency state of the DMD isogenic control line. The  
21 following pluripotency genes (*c-MYC*, *GDF-3*, *KLF4*, *NANOG*, *OCT4*, *REX1*, *SOX2* and *hTERT*) (F) and  
22 proteins (OCT4, NANOG, SSEA4, SOX2, TRA-1-60 and LIN28) (G) were analyzed. Human embryonic  
23 stem cell lines (hESCs) and commercially available undifferentiated hiPSC lines were used as positive  
24 controls. Each data point was represented as  $\Delta\text{Ct}$ , normalized for the housekeeping genes (*GAPDH*,  
25 *HPRT* and *RPL13a*). Data were representative of three independent experiments (n = 3) and values  
26 were expressed as mean  $\pm$  SEM. Significance of the difference was indicated as follows: \*p < 0.05; \*\*p  
27 < 0.01; \*\*\*p < 0.001 and \*\*\*\*p < 0.0001. Scale bar = 100  $\mu\text{m}$ .

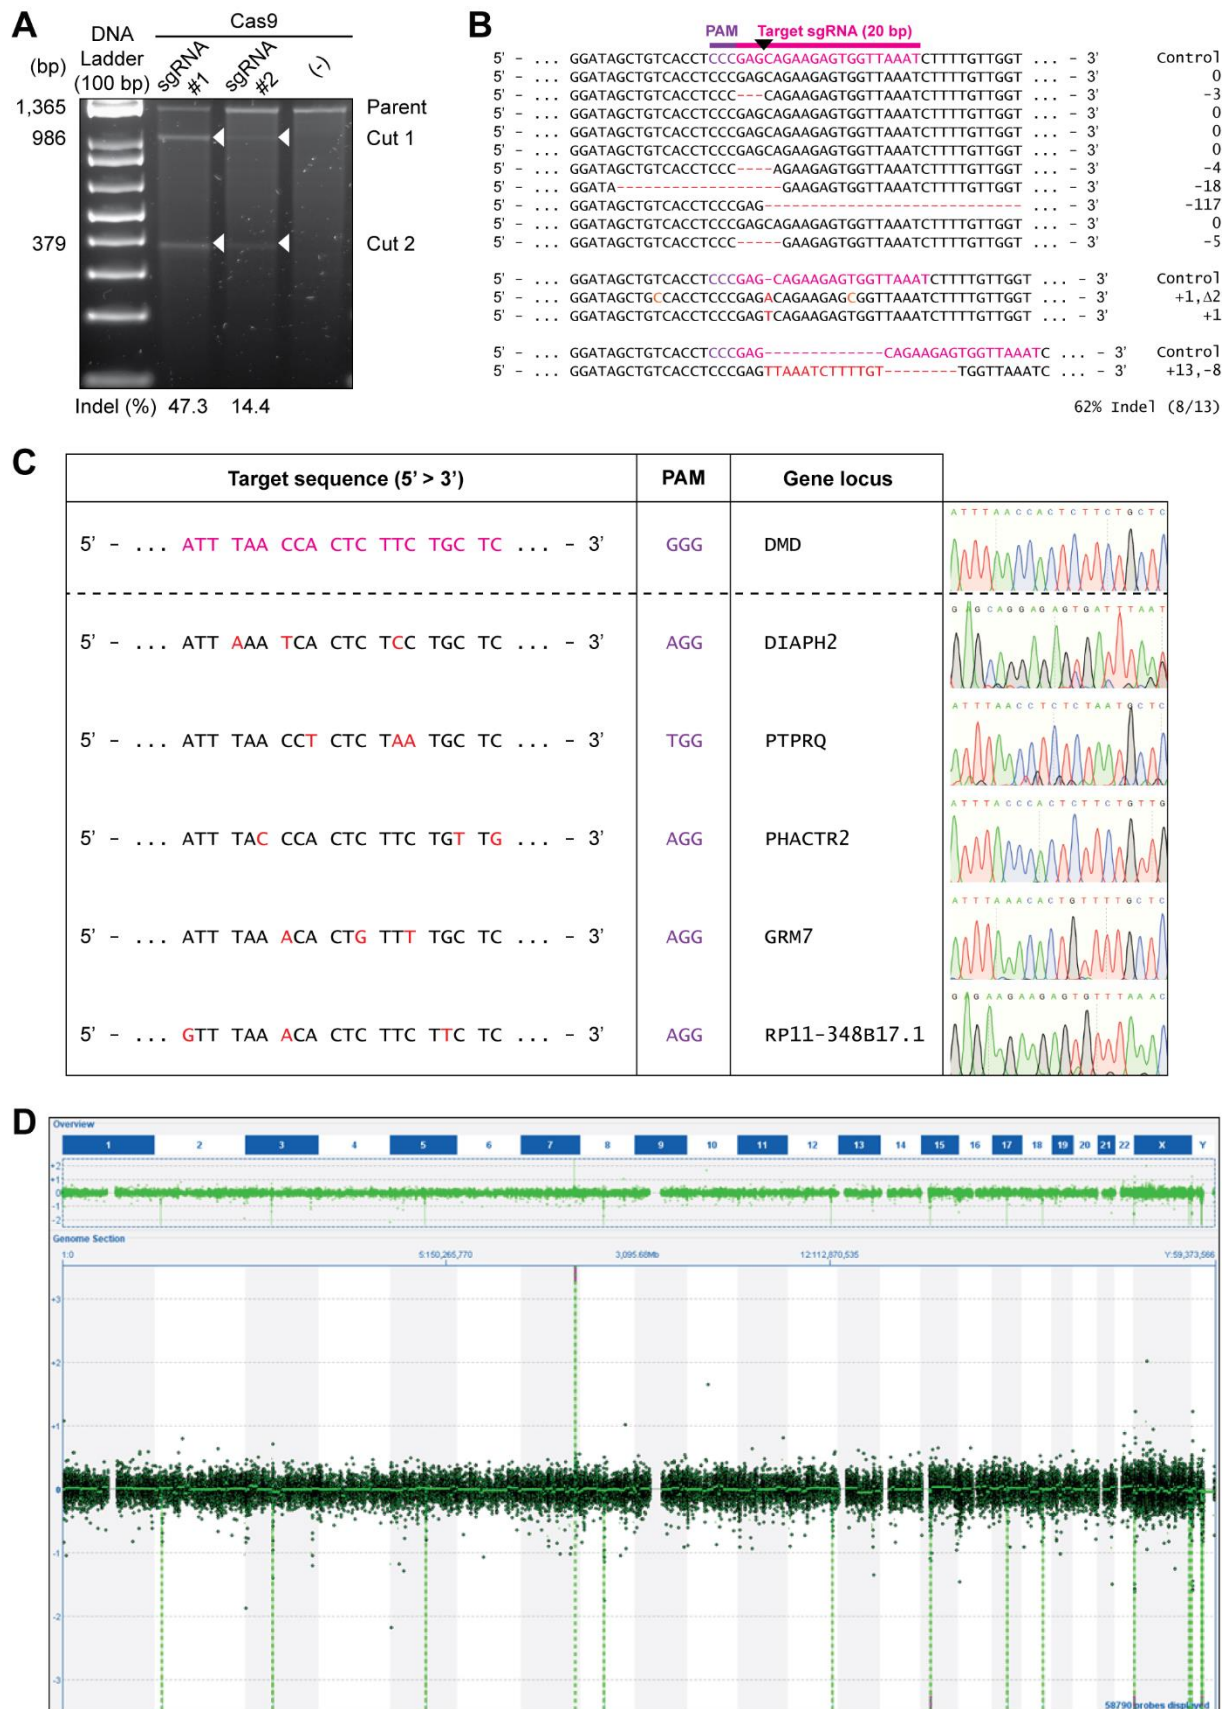

28  
 29  
 30  
 31  
 32  
 33

**Fig. S2: Validation of the Cas9 cutting efficiency and analysis of the off-targets. (A)** Surveyor assay in HEK293T cells to evaluate the cutting efficiency of the sgRNAs, represented as random events of base pair (bp) insertions or deletions (indel) after DSB. **(B)** DNA sequencing of the NHEJ events after transfection of the sgRNA-Cas9 plasmids in HEK293T cells. **(C)** List of CRISPR-Cas9 off-targets

34 (source: [www.synthego.com](http://www.synthego.com)). **(D)** Detailed CGH molecular karyotyping showing no additional  
35 chromosomal abnormalities due to unwanted Cas9-mediated DSB cuts.

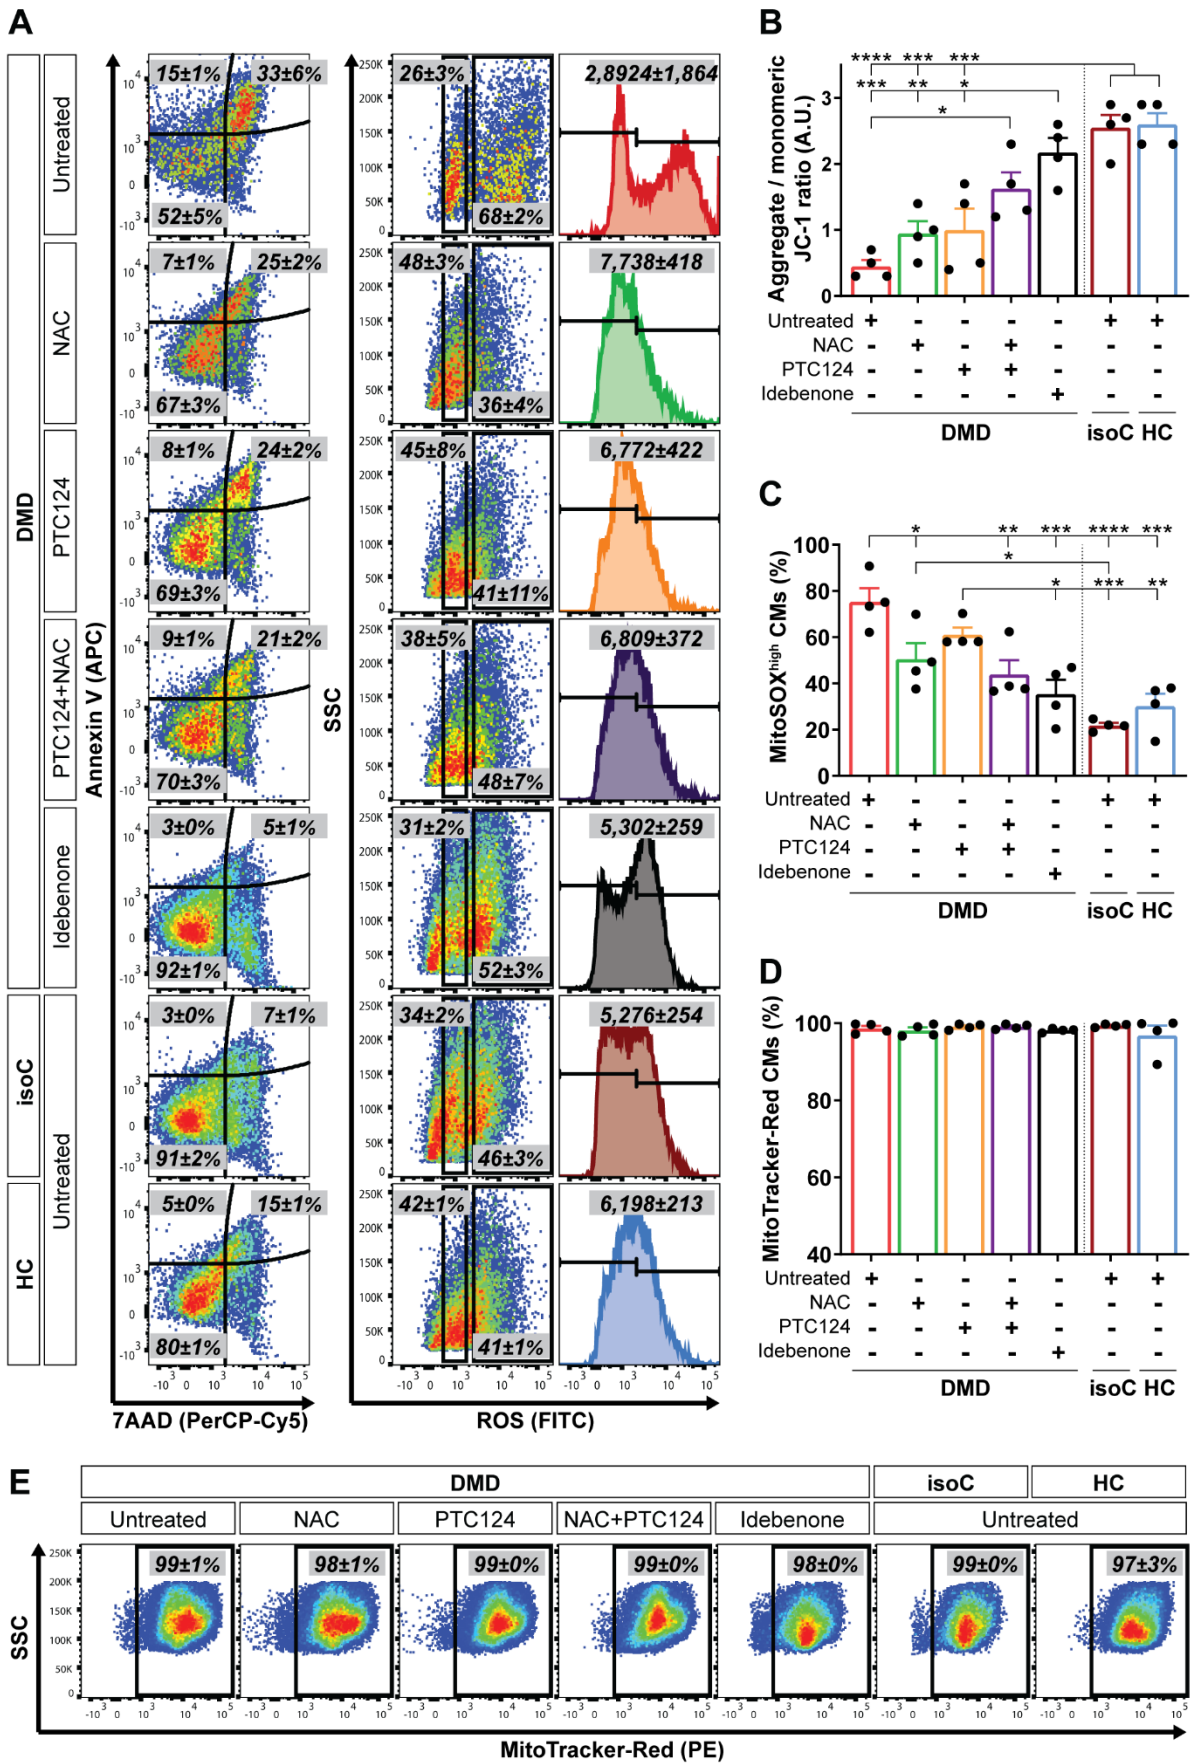

36  
37  
38  
39

**Fig. S3: Corresponding flow cytometric graphs and quantification for the characterization of the cardiomyopathic phenotype of DMD hiPSC-CMs, showing premature cell death, depolarized**

40 **mitochondria and increased intracellular ROS levels. (A)** Representative flow cytometric analyses  
41 at day 15 of cardiac differentiation showing the percentage of cell death (using annexin V, APC and  
42 7AAD, PerCP-Cy5, *left panels*) and intracellular ROS (FITC, *right panels*) in untreated and treated DMD  
43 hiPSC-CMs compared to the DMD isogenic and healthy controls. Human iPSC-CMs were stained for  
44 SIRPA (PE) to obtain high CM purity (data not shown). Flow cytometric quantification at day 15 of  
45 differentiation showing the JC-1 aggregates/monomers ratio **(B)** and the mitochondrial superoxide  
46 production (MitoSOX) in depolarized DMD mitochondria **(C)** compared to DMD isogenic and healthy  
47 controls. **(D)** Percentage of MitoTracker-Red positive CMs upon NAC, PTC124 and idebenone  
48 treatment. **(E)** Corresponding flow cytometric analyses of the percentage of MitoTracker-Red (PE)  
49 positive hiPSC-CMs. Data were representative of four independent experiments (n = 4). Data were  
50 reported as mean ± SEM; \*p < 0.05; \*\*p < 0.01; \*\*\*p < 0.001 and \*\*\*\*p < 0.0001.

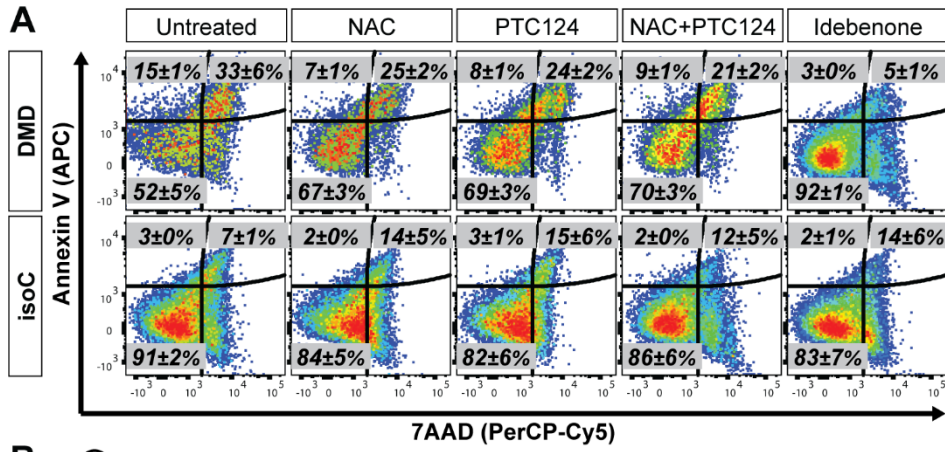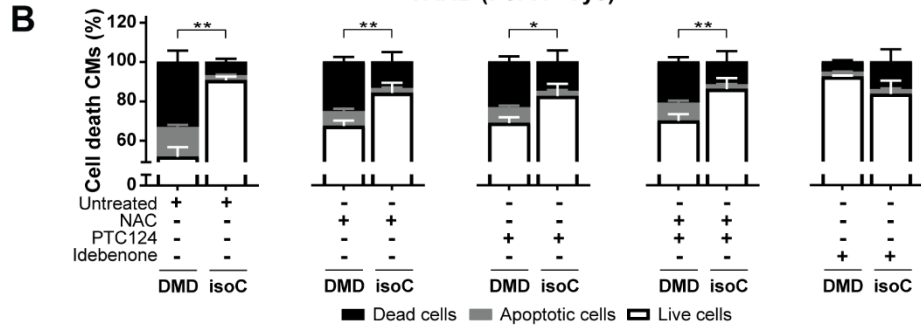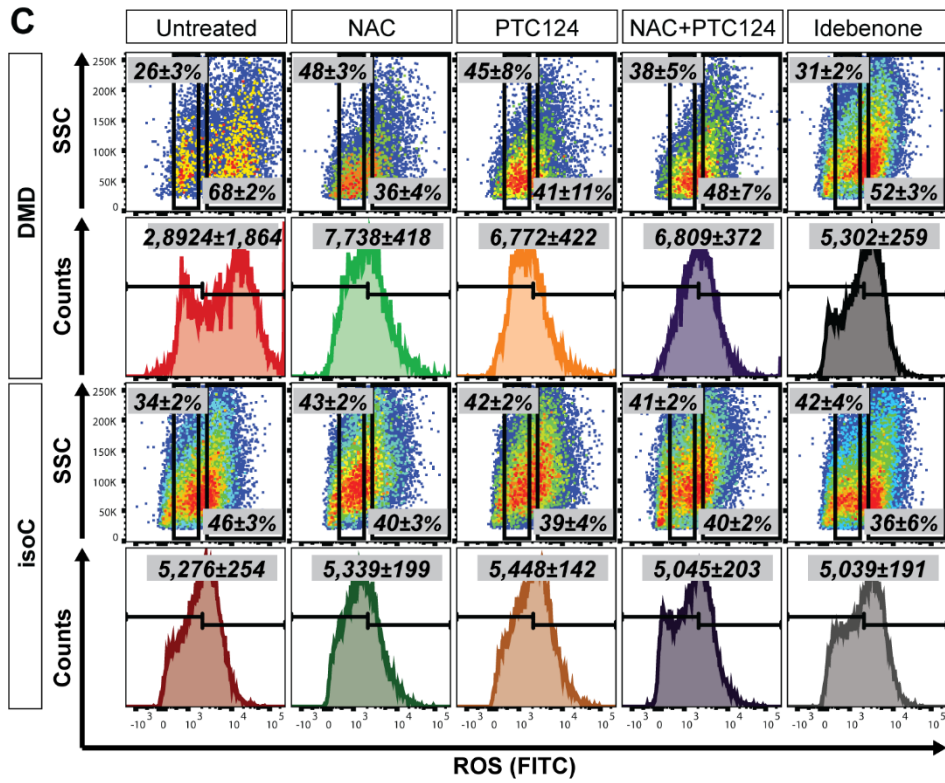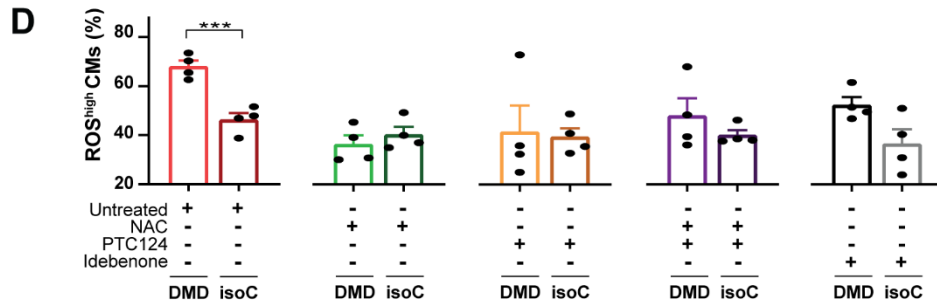



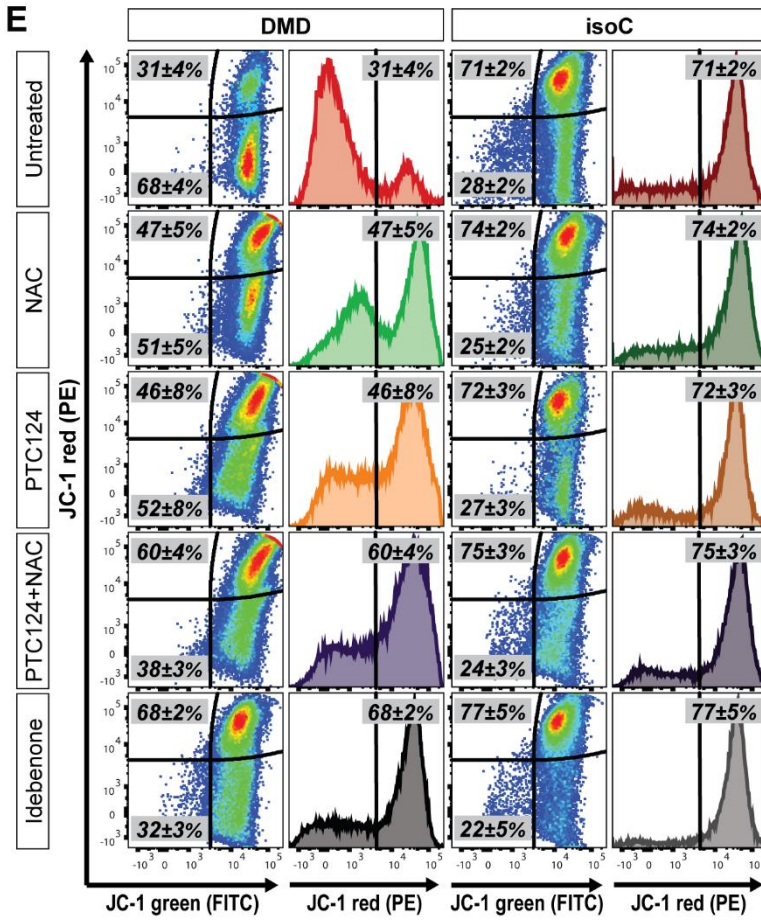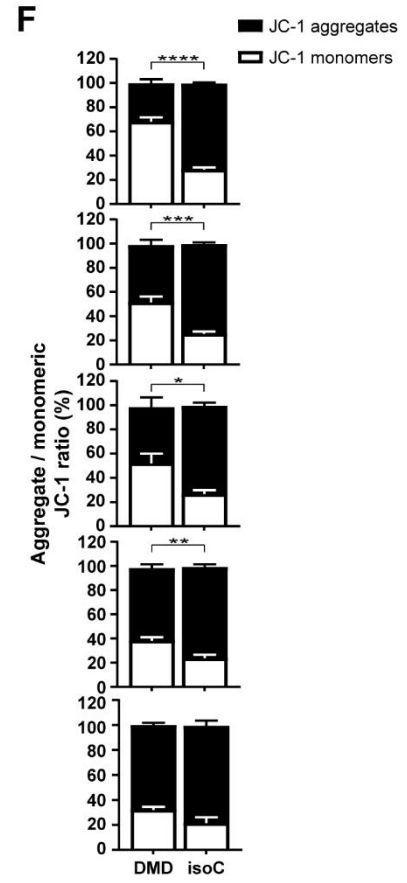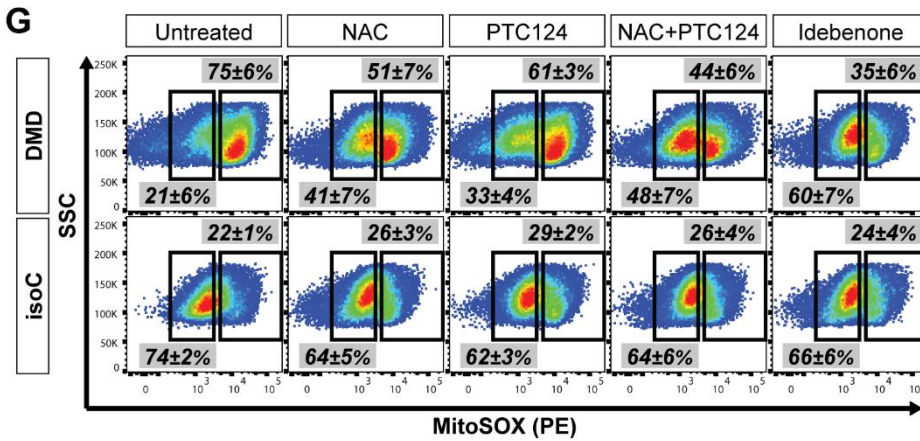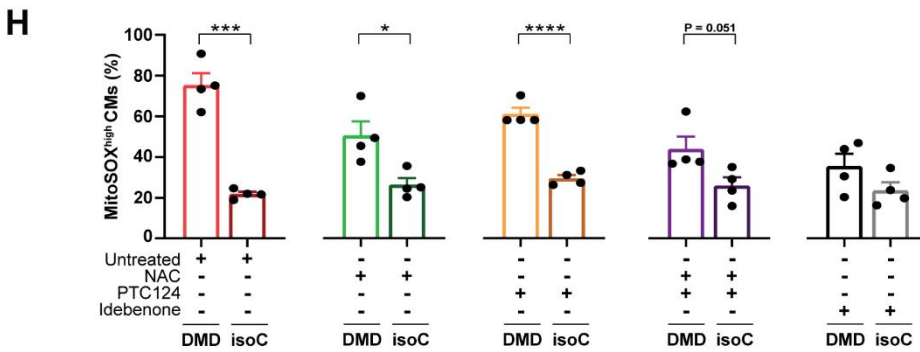

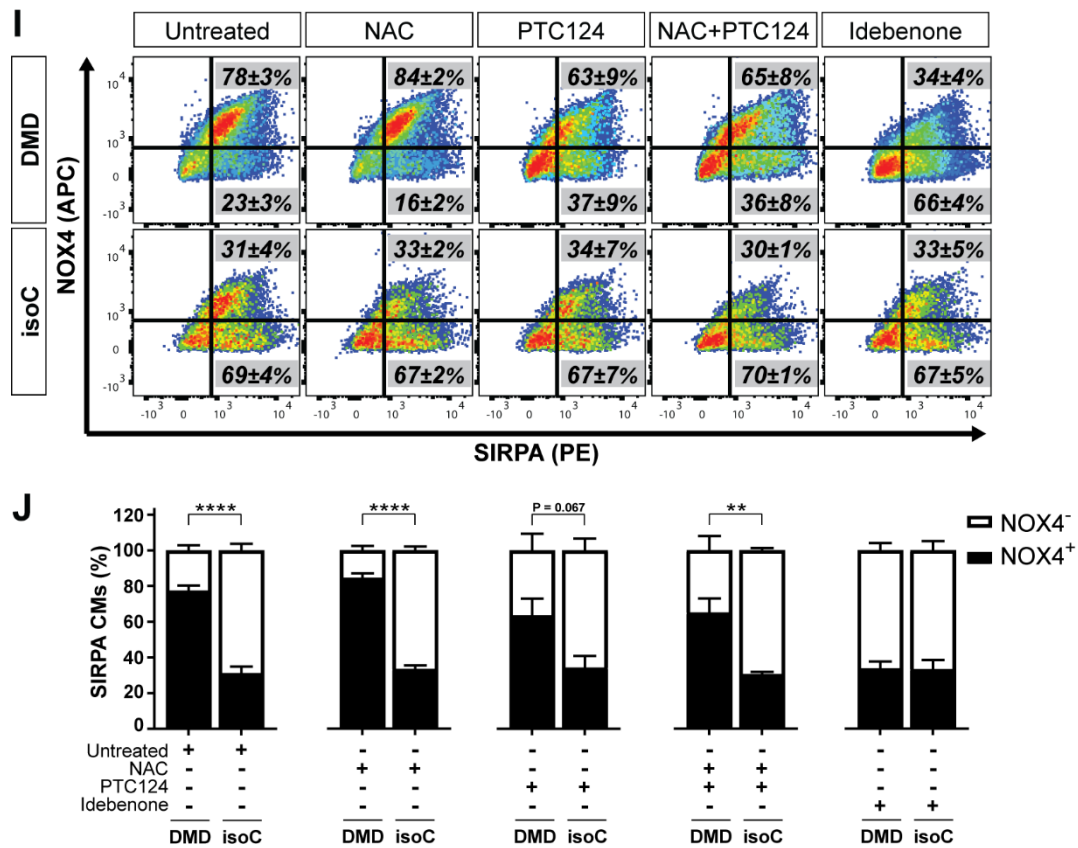

53  
54

55 **Fig. S4: Specificity of the treatment options on cell death and intracellular ROS concentrations,**  
56 **on  $\Delta\Psi_m$  and mitochondrial superoxide concentrations, and on the expression levels of NOX4 in**  
57 **the experimental hiPSC-CM groups. (A)** Example of flow cytometric analysis at day 15 of cardiac  
58 differentiation showing the percentage of cell death (using annexin V, APC and 7AAD, PerCP-Cy5) upon  
59 treatment in SIRPA (PE) positive hiPSC-CMs derived from DMD and DMD isogenic controls. **(B)**  
60 Corresponding flow cytometric quantification for cell death observed after the treatment options. **(C)**  
61 Representative flow cytometric analyses showing intracellular ROS concentrations in DMD and DMD  
62 isogenic hiPSC-CMs. **(D)** Quantification of the corresponding flow cytometric analyses showing the  
63 intracellular ROS levels. Data were representative of four independent experiments (n = 4). Data were  
64 reported as mean  $\pm$  SEM; \*p < 0.05; \*\*p < 0.01; \*\*\*p < 0.001 and \*\*\*\*p < 0.0001. **(E)** Representative  
65 flow cytometric analyses at day 15 of cardiac differentiation for JC-1 aggregates (PE) and JC-1  
66 monomers (FITC) upon treatment in DMD hiPSC-CMs and the DMD isogenic counterpart. **(F)**  
67 Corresponding flow cytometric quantification for  $\Delta\Psi_m$ . **(G)** Flow cytometric analyses at day 15 of  
68 differentiation showing the mitochondrial superoxide production (MitoSOX, PE) in depolarized DMD  
69 mitochondria. **(H)** Quantification of the corresponding flow cytometric analyses showing the  
70 mitochondrial superoxide production (MitoSOX). Data were representative of four independent  
71 experiments (n = 4). Flow cytometry data were reported as mean  $\pm$  SEM; \*p < 0.05; \*\*p < 0.01; \*\*\*p <  
72 0.001 and \*\*\*\*p < 0.0001. **(I)** Example of flow cytometric analysis at day 15 of cardiac differentiation  
73 showing the percentage of NOX4 (APC) on SIRPA (PE) positive DMD and DMD isogenic hiPSC-CMs  
74 upon the treatment options. **(J)** Corresponding flow cytometric quantification for NOX4. Data were  
75 representative of three independent experiments (n = 3). Flow cytometry data were reported as mean  $\pm$   
76 SEM; \*p < 0.05; \*\*p < 0.01; \*\*\*p < 0.001 and \*\*\*\*p < 0.0001.

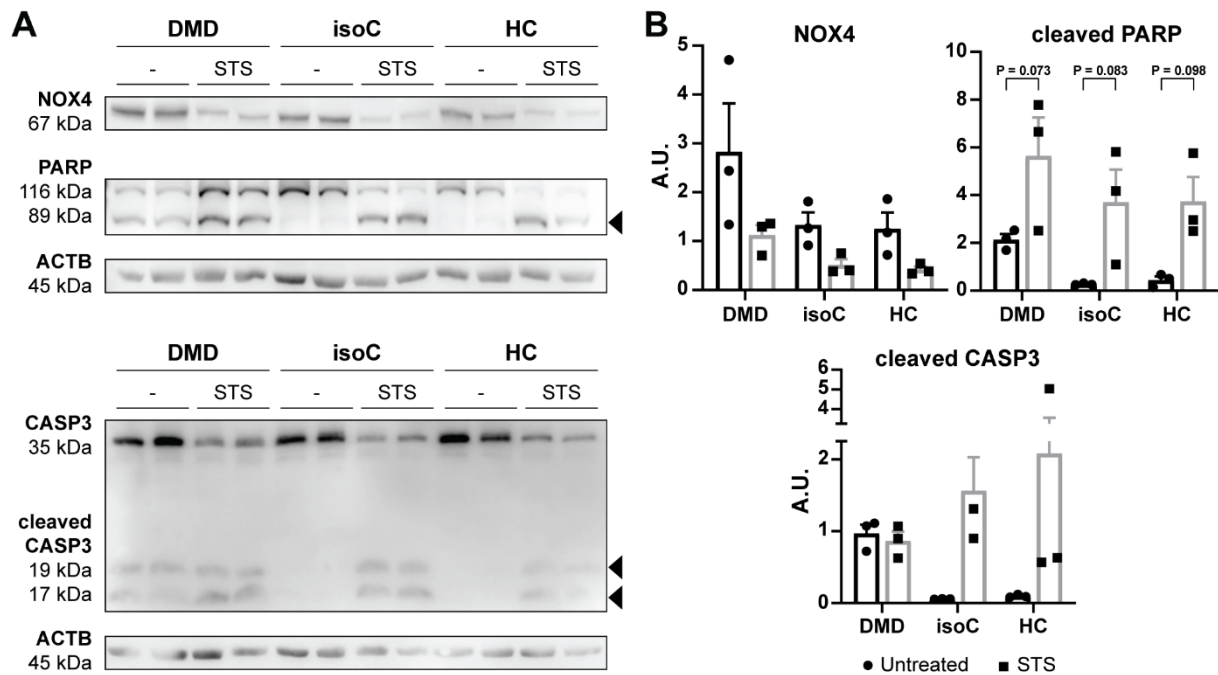

77  
78  
79  
80  
81  
82  
83  
84  
85

**Fig. S5: NOX4 protein expression levels after STS-induced cell death in DMD and control hiPSC-CMs.** (A) Western blot analysis showing cardiac NOX4 proteins and the cell death markers Poly (ADP-ribose) polymerase (PARP) and Caspase-3 (CASP3) in DMD and control hiPSC-CMs after a 6 h exposure to 1  $\mu$ M STS. Cleaved forms of PARP and CASP3 are indicated by black triangles. ACTB was used as loading control. (B) Quantification of the western blot analysis for the markers NOX4, cleaved PARP and cleaved CASP3. Data were representative of three independent experiments (n = 3) and values were expressed as mean  $\pm$  SEM.

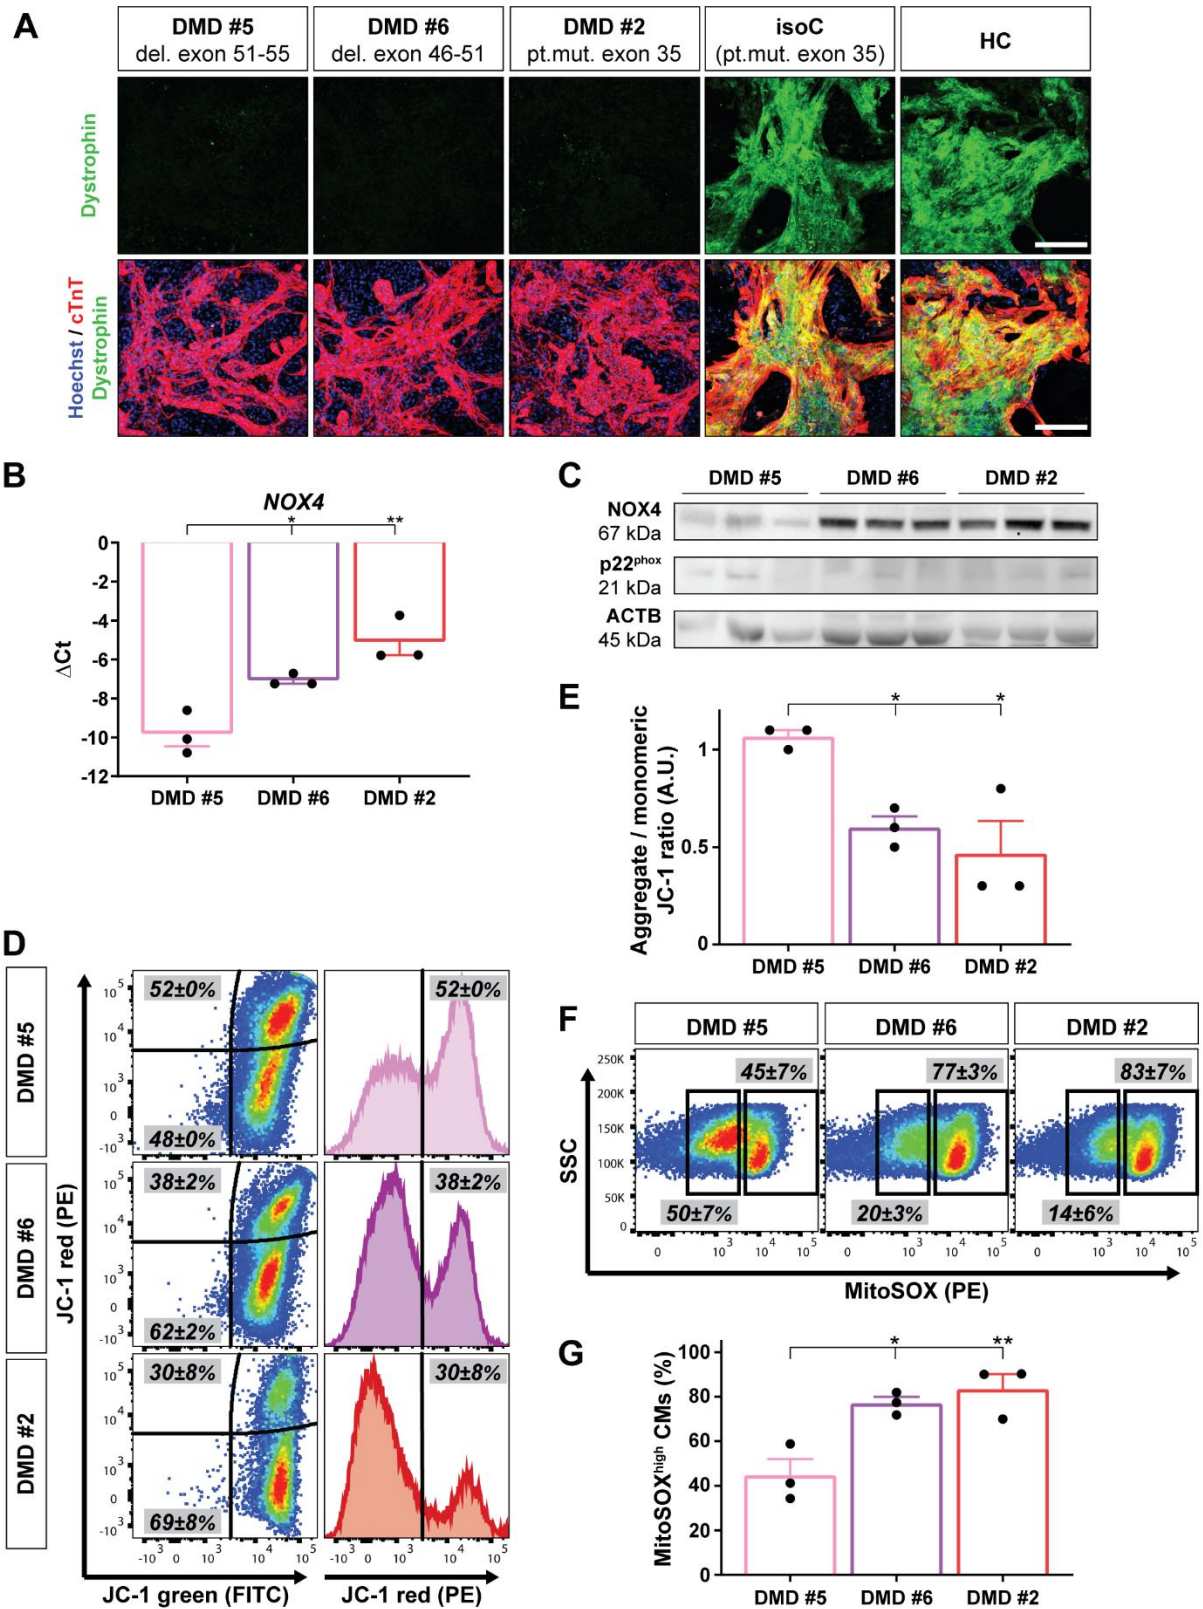

86  
87  
88  
89  
90  
91  
92  
93  
94

**Fig. S6: Characterization of the DMD patient-specific hiPSC-CMs *in vitro*, showing increased NOX4 gene and protein expression levels, depolarized mitochondria and increased intracellular ROS levels. (A)** Immunostaining showing the Dystrophin protein expression levels (green) in cTnT positive hiPSC-CMs (cTnT, red and Hoechst, blue), derived from three DMD patient subjects (DMD #2: pt. mut. exon 35; DMD #5: del. exon 51-55 and DMD #6: del. exon 46-51) and controls (see also Table S1). Scale bar = 100  $\mu$ m. **(B)** NOX4 mRNA levels in hiPSC-CMs of three DMD patients at day 8 of cardiac differentiation. Each data point was represented as  $\Delta$ Ct, normalized for the housekeeping genes

95 (*GAPDH* and *RPL13a*). Data were representative of three independent experiments (n = 3) and values  
96 were expressed as mean ± SEM; \*p < 0.05; \*\*p < 0.01; \*\*\*p < 0.001 and \*\*\*\*p < 0.0001. **(C)** Western  
97 blot analysis quantifying the corresponding NOX4 protein levels and its regulatory subunit p22<sup>phox</sup>,  
98 normalized to the loading protein ACTB. **(D)** Representative flow cytometric analyses at day 15 of  
99 differentiation for JC-1 aggregates (PE) and JC-1 monomers (FITC) in three DMD patient-specific  
100 hiPSC-CMs. **(E)** Corresponding flow cytometric quantification of JC-1 aggregates and JC-1 monomers.  
101 **(F)** Flow cytometric analyses at day 15 of differentiation showing the mitochondrial superoxide  
102 production (MitoSOX, PE) in depolarized DMD mitochondria. **(G)** Corresponding flow cytometric  
103 quantification for the number of CMs with high mitochondrial superoxide concentrations. Data were  
104 representative of three independent experiments (n = 3). Flow cytometry data were reported as mean ±  
105 SEM; \*p < 0.05; \*\*p < 0.01; \*\*\*p < 0.001 and \*\*\*\*p < 0.0001.

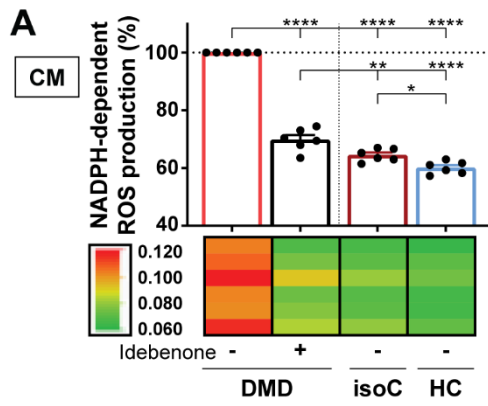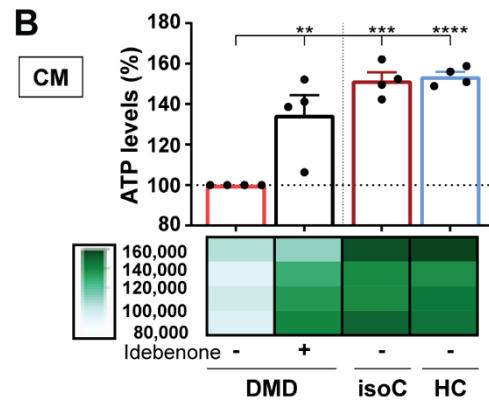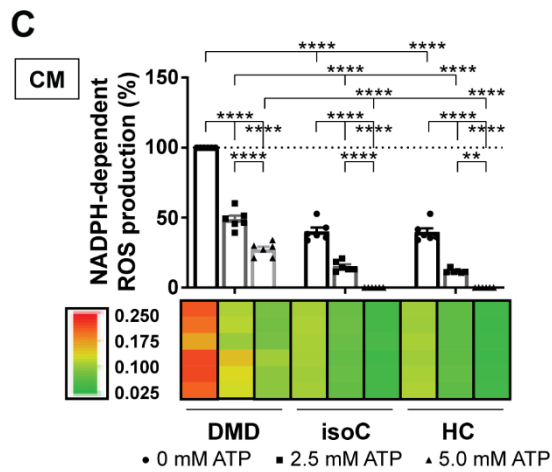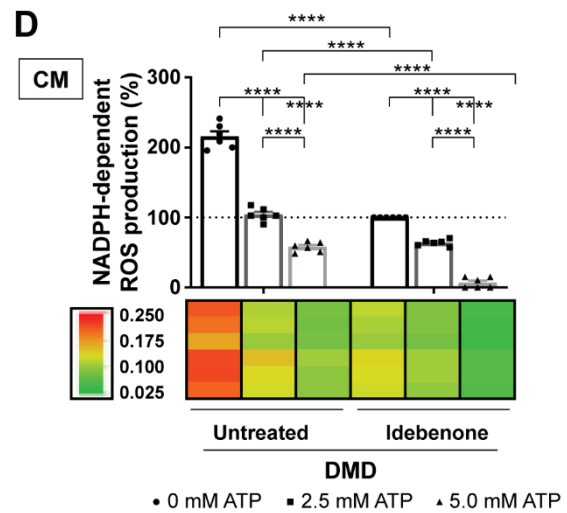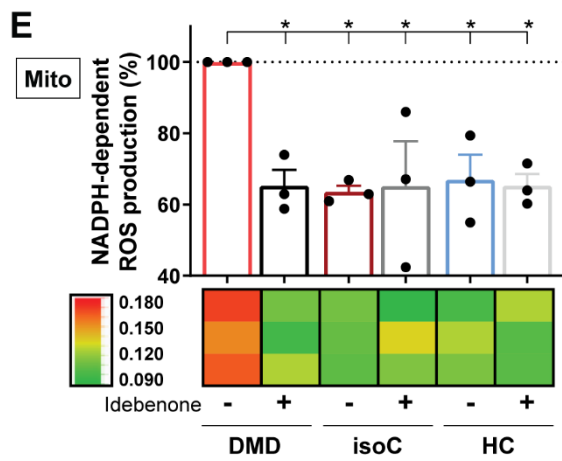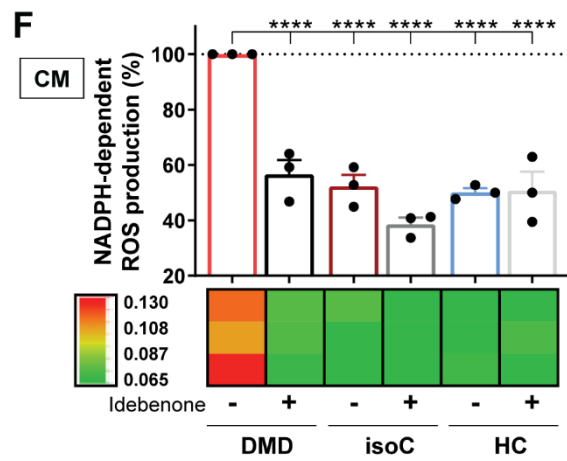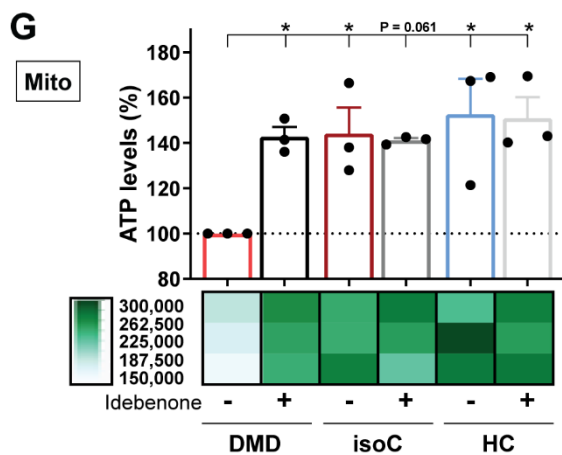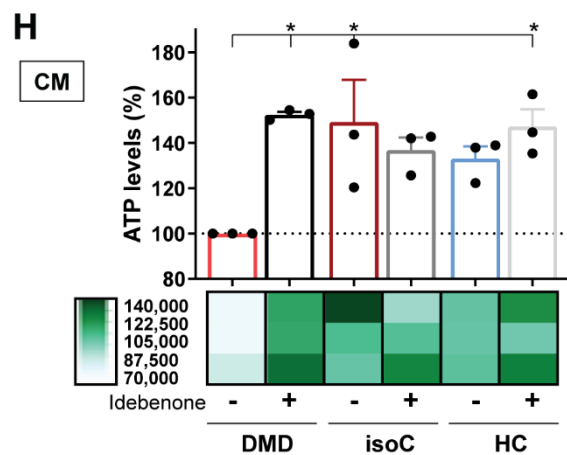

107  
108  
109  
110  
111  
112  
113  
114  
115  
116  
117  
118  
119  
120  
121  
122  
123  
124  
125  
126  
127  
128

**Fig. S7: NADPH-dependent ROS production and intracellular ATP levels in DMD hiPSC-CMs after idebenone application, and the specificity of idebenone on the NADPH-dependent ROS production and ATP levels in the experimental hiPSC-CM groups.** **(A)** Quantification of the NADPH-dependent superoxide production of NOX4 in the total CM fraction of DMD hiPSC-CMs with or without idebenone addition compared to controls. **(B)** ATP luminescence detection showing the effect of idebenone treatment on the intracellular ATP levels in DMD hiPSC-CMs. **(C)** Quantification of the ROS-producing NOX4 activity after 2.5 and 5.0 mM ATP addition in DMD hiPSC-CM and control cultures. Each data point was represented as percentage (%), normalized to the total CM fraction of the untreated DMD hiPSC-CMs. **(D)** Quantification of the NADPH-dependent superoxide production of NOX4 in the total CM fraction of DMD hiPSC-CMs upon 2.5 and 5.0 mM ATP addition, with or without idebenone treatment. Each data point was represented as percentage (%), normalized to the total CM fraction of the idebenone-treated DMD hiPSC-CM cultures. Data were representative of four or six independent experiments (n = 4 or n = 6) and values were expressed as mean  $\pm$  SEM; \*p < 0.05; \*\*p < 0.01; \*\*\*p < 0.001 and \*\*\*\*p < 0.0001. Colored rectangles represented the independent experiments. Quantification of the NADPH-dependent superoxide production of NOX4 in the mitochondrial **(E)** and CM fraction **(F)** of hiPSC-CMs derived from DMD, DMD isogenic and healthy controls with or without idebenone treatment. **(G-H)** ATP luminescence detection showing the effect of idebenone treatment on the ATP levels in hiPSC-CMs cultures. Each data point was represented as percentage (%), normalized to the untreated DMD hiPSC-CM cultures. Data were representative of three independent experiments (n = 3) and values were expressed as mean  $\pm$  SEM; \*p < 0.05; \*\*p < 0.01; \*\*\*p < 0.001 and \*\*\*\*p < 0.0001. Colored rectangles represented the independent experiments.

129  
130

**Table S1:** Characteristics of DMD subjects and hiPSC lines.

| ID                        | DMD #2                                            | DMD #5          | DMD #6          | DMD #2 isogenic                              | HC #1   | HC #2   | HC #3   |
|---------------------------|---------------------------------------------------|-----------------|-----------------|----------------------------------------------|---------|---------|---------|
| <b>Origin</b>             | hFs                                               | hPBMCs          | hPBMCs          | DMD #2                                       | hPBMCs  | hFs     | hFs     |
| <b>Mutation</b>           | pt.mut. exon 35<br>(c.4,996C > T;<br>p.Arg1,666X) | del. exon 51-55 | del. exon 46-51 | CRISPR-Cas9<br>correction<br>pt.mut. exon 35 | NA      | NA      | NA      |
| <b>Category</b>           | diseased                                          | diseased        | diseased        | healthy                                      | healthy | healthy | healthy |
| <b>Phenotype</b>          | <b>Age start steroids</b>                         | 7.5 years       | 4.5 years       | 6.5 years                                    | NA      | NA      |         |
|                           | <b>Age loss of ambulation</b>                     | 8.5 years       | 10 years        | 11 years                                     |         |         |         |
| <b>Cardiomyopathy</b>     | <b>FS &lt; 30%</b>                                | yes, 29%        | no, 32%         | no, 32%                                      |         |         |         |
|                           | <b>EF</b>                                         | 50%             | 66%             | 61%                                          |         |         |         |
|                           | <b>Measured at age</b>                            | 20 years        | 9 years         | 20 years                                     |         |         |         |
|                           | <b>Age at onset</b>                               | 10 Years        | NA              | NA                                           |         |         |         |
| <b>Pulmonary function</b> | <b>FVC &lt; 50%</b>                               | yes, 7%         | no, 80%         | yes, 19%                                     |         |         |         |
|                           | <b>Measured at age</b>                            | 25 years        | 9 years         | 19 years                                     |         |         |         |

131



132 All DMD and control lines were previously characterized in-house or already published.  
133 In the current study, somatic cells from DMD subjects were used to generate three diseased hiPSC lines  
134 DMD #2, DMD #5 and DMD #6 (Patel et al., 2019). Four different human control lines were used: (1)  
135 the DMD isogenic control line was in-house generated through CRISPR-Cas9 gene editing, as  
136 described in Materials and Methods; (2) HC #1 is commercially available from Thermo Fisher Scientific  
137 (Catalog number A18945); (3) HC #2 was kindly provided by Prof. C. Verfaillie (University of Leuven,  
138 Belgium) and generated by transduction of the new-born male fibroblast BJ1 cell line, as published by  
139 Coll et al. (Coll et al., 2018); and (4) HC #3 was a gift from Prof. P. Jennings (Medizinische Universität  
140 Innsbruck, Austria) to Prof. C. Verfaillie and generated by SeV-based reprogramming of male donor  
141 fibroblasts (SBAD2), as published by Rauch et al. (Rauch et al., 2018).  
142 DMD: Duchenne muscular dystrophy; HC: healthy control; hPBMCs: human peripheral blood  
143 mononuclear cells; hFs: human fibroblasts; FS: fractional shortening; EF: ejection fraction; FVC: forced  
144 vital capacity; NA: not applicable.

145  
146

**Table S2:** List of primers for Quantitative Real-Time PCR.

| <b>Gene</b>               | <b>Primer direction</b> | <b>Primer sequence (5' &gt; 3')</b> |
|---------------------------|-------------------------|-------------------------------------|
| <b>c-MYC</b>              | forward                 | TCCTCGGATTCTCTGCTCTCCT              |
|                           | reverse                 | AGAAGGTGATCCAGACTCTGACCT            |
| <b>Dystrophin</b>         | forward                 | ATGCTTTGGTGGGAAGAAGT                |
|                           | reverse                 | GGGCATGAACTCTTGTGGAT                |
| <b>GAPDH</b>              | forward                 | TCAAGAAGGTGGTGAAGCAGG               |
|                           | reverse                 | ACCAGGAAATGAGCTTGACAAA              |
| <b>GDF-3</b>              | forward                 | ACACCTGTGCCAGACTAAGATGCT            |
|                           | reverse                 | TGACGGTGGCAGAGGTTCTTACAA            |
| <b>HPRT</b>               | forward                 | TGACACTGGCAAACAATGCA                |
|                           | reverse                 | GGTCCTTTTCACCAGCAAGCT               |
| <b>hTERT</b>              | forward                 | AAATGCGGCCCTGTTTTCT                 |
|                           | reverse                 | CAGTGCGTCTTGAGGAGCA                 |
| <b>KLF-4</b>              | forward                 | CGGACATCAACGACGTGAG                 |
|                           | reverse                 | GACGCCTTCAGCACGAACT                 |
| <b>MALAT1</b>             | forward                 | GGACTIONGCCTCAACTCCCTC              |
|                           | reverse                 | GCCCTCTCAGCCACTCAAAT                |
| <b>MYH6</b>               | forward                 | GCCCTTTGACATTCCGACTG                |
|                           | reverse                 | CGGGACAAAATCTTGGCTTTGA              |
| <b>MYH7</b>               | forward                 | ACTGCCGAGACCGAGTATG                 |
|                           | reverse                 | GCGATCCTTGAGGTTGTAGAGC              |
| <b>MYL2</b>               | forward                 | TTGGGCGAGTGAACGTGAAAA               |
|                           | reverse                 | CCGAACGTAATCAGCCTTCAG               |
| <b>MYL7</b>               | forward                 | ACATCATCACCCACGGAGAAGAGA            |
|                           | reverse                 | ATTGGAACATGGCCTCTGGATGGA            |
| <b>NANOG</b>              | forward                 | TGGCCGAAGAATAGCAATGGTGTG            |
|                           | reverse                 | TTCCAGGTCTGGTTGCTCCACATT            |
| <b>NOX2</b>               | forward                 | TGCCAGTCTGTGCAAATCTGC               |
|                           | reverse                 | ACTCGGGCATTACACACC                  |
| <b>NOX4</b>               | forward                 | TCCGAGCAATAAGCCAGTC                 |
|                           | reverse                 | CCATTCGGATTTCCATGACAT               |
| <b>OCT4</b>               | forward                 | CGAGCAATTTGCCAAGCTCCTGAA            |
|                           | reverse                 | GCCGCAGCTTACACATGTTCTTGA            |
| <b>p22<sup>phox</sup></b> | forward                 | TACTATGTTCCGGGCCGTCCT               |
|                           | reverse                 | CACAGCCGCCAGTAGGTA                  |
| <b>p47<sup>phox</sup></b> | forward                 | GGGGCGATCAATCCAGAGAAC               |
|                           | reverse                 | GTACTIONCGGTAAGTGTGCCCTG            |
| <b>p67<sup>phox</sup></b> | forward                 | CCAGAAGCATTAAACCGAGACAA             |
|                           | reverse                 | CCTCGAAGCTGAATCAAGGC                |
| <b>RAC1</b>               | forward                 | ATGTCCGTGCAAAGTGGTATC               |
|                           | reverse                 | CTCGGATCGCTTCGTCAAACA               |
| <b>RAC2</b>               | forward                 | TCTGCTTCTCCCTCGTCAG                 |
|                           | reverse                 | TCACCGAGTCAATCTCCTTGG               |
| <b>RAC3</b>               | forward                 | CTTCGAGAATGTTTCGTGCCAA              |
|                           | reverse                 | CCGCTCAATGGTGTCTTGG                 |
| <b>REX1</b>               | forward                 | TGGAGGAATACCTGGCATTGACCT            |
|                           | reverse                 | AGCGATTGCGCTCAGACTGTCATA            |
| <b>RPL13a</b>             | forward                 | CCTGGAGGAGAAGAGGAAAGAGA             |
|                           | reverse                 | TTGAGGACCTCTGTGATTTGTCAA            |
| <b>SOX2</b>               | forward                 | TGGCGAACCATCTCTGTGGT                |
|                           | reverse                 | CCAACGGTGTCAACCTGCAT                |
| <b>TNNI1</b>              | forward                 | CCCAGCTCCACGAGGACTGAACA             |
|                           | reverse                 | TTTGCGGGAGGCAGTGATCTTGG             |
| <b>TNNI3</b>              | forward                 | GATGCGGCTAGGGAACCTC                 |
|                           | reverse                 | GCATAAGCGCGGTAGTTGGA                |

147  
148

**Table S3:** List of antibodies for flow cytometry (FC), immunostaining (IF) and western blot (WB).

| Protein                        | Antibody name<br>(#catalog number)                                                            | Provider                     | FC      | IF    | WB      |
|--------------------------------|-----------------------------------------------------------------------------------------------|------------------------------|---------|-------|---------|
| <b>ACTA2</b>                   | Anti-Alpha Smooth Muscle Actin<br>(Mouse monoclonal) ( <b>#A2547</b> )                        | Merck                        |         | 1:300 |         |
| <b>ACTB</b>                    | Beta Actin (13E5)<br>(Rabbit monoclonal) ( <b>#4970</b> )                                     | Cell Signaling<br>Technology |         |       | 1:1,000 |
| <b>ACTN2</b>                   | Anti-Sarcomeric Alpha Actinin<br>(EA-53)<br>(Mouse monoclonal) ( <b>#ab9465</b> )             | Abcam                        |         |       | 1:100   |
| <b>AFP</b>                     | Anti-Human Alpha-1-Fetoprotein<br>(Rabbit polyclonal) ( <b>#A0008</b> )                       | Dako                         |         | 1:150 |         |
| <b>Annexin V</b>               | APC Annexin V ( <b>#550474</b> )                                                              | BD<br>Pharmingen             | 1:20    |       |         |
| <b>CASP3<br/>(cleaved)</b>     | Cleaved Caspase-3 (Asp175)<br>(Rabbit polyclonal) ( <b>#9661</b> )                            | Cell Signaling<br>Technology |         |       | 1:500   |
| <b>CASP3<br/>(full length)</b> | Caspase-3<br>(Rabbit polyclonal) ( <b>#9662</b> )                                             | Cell Signaling<br>Technology |         |       | 1:1,000 |
| <b>cTnT</b>                    | Recombinant Anti-Cardiac<br>Troponin T (EPR3696)<br>(Rabbit monoclonal) ( <b>#ab92546</b> )   | Abcam                        |         | 1:100 |         |
| <b>p22<sup>phox</sup></b>      | Anti-Cytochrome b245 Light<br>Chain/p22-phox (44.1)<br>(Mouse monoclonal) ( <b>#ab80896</b> ) | Abcam                        |         |       | 1:100   |
| <b>Dystrophin<br/>(DMD)</b>    | DYS1 (Rod Domain)<br>(Mouse monoclonal)<br>( <b>#NCL-DYS1</b> )                               | Leica<br>Novocastra          |         | 1:25  |         |
| <b>Dystrophin<br/>(DMD)</b>    | DYS2 (C-terminus)<br>(Mouse monoclonal)<br>( <b>#NCL-DYS2</b> )                               | Leica<br>Novocastra          |         | 1:25  |         |
| <b>Dystrophin<br/>(DMD)</b>    | DYS3 (N-terminus)<br>(Mouse monoclonal)<br>( <b>#NCL-DYS3</b> )                               | Leica<br>Novocastra          |         | 1:25  |         |
| <b>LIN28</b>                   | LIN-28 (S-15)<br>(Goat polyclonal) ( <b>#sc-54032</b> )                                       | Santa Cruz<br>Biotechnology  |         | 1:50  |         |
| <b>NANOG</b>                   | Nanog<br>(Rabbit polyclonal) ( <b>#PA1-097</b> )                                              | Thermo Fisher<br>Scientific  |         | 1:200 |         |
| <b>NOX4</b>                    | Anti-NADPH Oxidase 4<br>(Rabbit monoclonal)<br>( <b>#ab133303</b> )                           | Abcam                        | 1:2,175 |       | 1:1,000 |
| <b>OCT4</b>                    | Anti-Oct4 - Embryonic Stem Cell<br>Marker<br>(Goat polyclonal) ( <b>#ab27985</b> )            | Abcam                        |         | 1:200 |         |
| <b>PARP</b>                    | PARP (46D11)<br>(Rabbit monoclonal) ( <b>#9532</b> )                                          | Cell Signaling<br>Technology |         |       | 1:1,000 |
| <b>SIRPA</b>                   | PE Anti-Human CD172a/b<br>(SIRP $\alpha/\beta$ ) ( <b>#323806</b> )                           | BioLegend                    | 1:100   |       |         |
| <b>SOX2</b>                    | Sox-2 (Y-17)<br>(Goat polyclonal) ( <b>#sc-17320</b> )                                        | Santa Cruz<br>Biotechnology  |         | 1:50  |         |
| <b>SSEA4</b>                   | SSEA-4 (MC813)<br>(Mouse monoclonal)<br>( <b>#sc-59368</b> )                                  | Santa Cruz<br>Biotechnology  |         | 1:50  |         |
| <b>TRA-1-60</b>                | TRA-1-60 (TRA-1-60)<br>(Mouse monoclonal)<br>( <b>#sc-21705</b> )                             | Santa Cruz<br>Biotechnology  |         | 1:50  |         |
| <b>TUBB</b>                    | Beta Tubulin<br>(Rabbit monoclonal)<br>( <b>#NB110-57610</b> )                                | NovusBio                     |         | 1:250 |         |

## SUPPLEMENTAL EXPERIMENTAL PROCEDURES

### *Study design and ethics statement*

The objective of this study is to develop a stem cell-based model to investigate pathological mechanisms and evaluate their therapeutical potential in cardiomyopathy in DMD patients. The study was conducted in compliance with the principles of the Declaration of Helsinki, the principles of 'Good Clinical Practice' (GCP) and in accordance with all applicable regulatory requirements. The use of human samples from healthy control donors and DMD subjects for experimental purposes and protocols in the present study was approved by the Ethics Committee of the University Hospitals Leuven (respectively, S55438 and S65190). Subjects information, used in this study, is summarized in Table S1.

### *Chemicals and reagents*

NAC (Merck), ataluren (PTC124; Selleckchem) and idebenone (Santhera Pharmaceuticals, Pratteln Switzerland). STS (Merck). CM-H<sub>2</sub>DCFDA Total Intracellular ROS Indicator, JC-1 Mitochondrial Membrane Potential Probe, MitoSOX Red Mitochondrial Superoxide Indicator and MitoTracker-Red CMXRos Mitochondria Probe (all from Thermo Fisher Scientific). ATP Solution, Luminescent ATP Detection Assay Kit, Colorimetric NADPH Assay Kit (both from Abcam) and Mitochondrial Isolation Kit for Cultured Cells (Thermo Fisher Scientific).

### *Generation of integration-free DMD hiPSCs*

hFs and hPBMCs were isolated from DMD patients with known *Dystrophin* mutations (Table S1). Somatic cells were reprogrammed towards pluripotency using the integration-free SeV-based technology, performed according to the manufacturer's instructions (CytoTune-iPS 2.0 Sendai Reprogramming Kit; Thermo Fisher Scientific).

### *Teratoma formation assay*

Pluripotency of SeV-reprogrammed hiPSCs was evaluated *in vivo* in 6- to 8-week-old immunodeficient *Rag2-null*  $\gamma$ C-null/Balb/C mice. Teratoma formation experiments in mice were conducted following the guidelines of the Animal Welfare Committee of Leuven University and Belgian/European legislation (approved July 2016; P174/2016).

### *Generation of DMD isogenic control line through CRISPR-Cas9 genome editing*

To restore full-length expression of the *Dystrophin* gene, the isogenic control for the DMD hiPSC patient line, characterized by a genetic point mutation in exon 35 (c.4,996C > T; p.Arg1,666X) of the *Dystrophin* gene, was generated through CRISPR-Cas9 from the *S. pyogenes* system (5'-NGG PAM) as previously described (Ran et al., 2013). Briefly, two 20-nucleotide sgRNAs (sgRNA #1: FW seq. CACCG-ATTTAACCACTCTTCTGCTC and RV seq. AAAC-GAGCAGAAGAGTGGTTAAAT-C; sgRNA #2: FW seq. CACCG-TAACCACTCTTCTGCTCAGG and RV seq. AAAC-CCTGAGCAGAAGAGTGGTTA-C) were designed and ligated into the RNA-guided nuclease plasmid (pX330-mCherry plasmid; Addgene), in order to induce the Cas9-mediated DSB in the genomic DNA of the Dystrophin-deficient hiPSCs. Cas9-mediated genome editing was performed via HDR. The targeted DNA modification required the use of a plasmid-based donor repair template with two homology arm regions for the *Dystrophin* gene, flanking a GFP-Hygromycin-TK expressing cassette for selection. Here, one of the homology arms contained the genetic correction of the nonsense mutation in the *Dystrophin* gene. Finally, a completely gene editing-free DMD isogenic hiPSC line was obtained due to PiggyBac excision and Fialuridine (FIAU; Merck) selection, restoring the expression of functional Dystrophin protein (Table S1).

### *Quantitative Real-Time PCR analysis*

Total RNA was extracted using the PureLink RNA Mini Kit and treated with the TURBO DNA-Free DNase Kit to assure highly pure RNA. 1  $\mu$ g RNA was reverse transcribed into cDNA with SuperScript III Reverse Transcriptase First-Strand Synthesis SuperMix. Quantitative Real-Time PCR was performed with the Platinum SYBR Green qPCR SuperMix-UDG (all from Thermo Fisher Scientific). The oligonucleotide primer sequences (all from IDT) are listed in Table S2. A 10-fold dilution series ranging from 10<sup>-3</sup> to 10<sup>-8</sup> of 50 ng/ $\mu$ L human genomic DNA was used to evaluate the primer efficiency. Delta Ct ( $\Delta$ Ct) values were calculated by subtracting the Ct values from the genes of interest with the Ct values of the housekeeping genes (*GAPDH*, *HPRT* and *RPL13a*).

### *Flow cytometric analysis*

Differentiated hiPSC-CMs were dissociated using Collagenase A (1 U/mL) for 20 minutes at 37°C. All flow cytometry procedures were performed according to the manufacturer's instructions. Hank's

211 Balanced Salt Solution (HBSS; pH 7.2) with CaCl<sub>2</sub> and MgCl<sub>2</sub> supplemented with 2% FBS (both from  
212 Thermo Fisher Scientific), 10 mM HEPES and 10 mM NaN<sub>3</sub> (both from Merck), was used as staining  
213 buffer. For high CM purity, hiPSC-CMs were stained for the surface marker SIRPA (data not shown). If  
214 intracellular staining was necessary, cells were fixed with 4% paraformaldehyde (PFA; Polysciences)  
215 for 10 minutes at 37°C and permeabilized in ice-cold 90% methanol (Merck) for 30 minutes on ice,  
216 before the staining procedure. Fluorescence minus one (FMO) controls and compensations were  
217 included for appropriate gating. Samples were analyzed using the FACS Canto II HTS (BD Biosciences)  
218 and quantified using FlowJo Software Version 10 (FlowJo LLC). Table S3 provides a list of all flow  
219 cytometric antibodies used in this study.

220

#### 221 *Immunofluorescence imaging*

222 Cells were fixed with 4% PFA for 10 minutes at 4°C, permeabilized for 30 minutes at room temperature  
223 in PBS supplemented with 0.2% Triton X-100 and 1% Bovine Serum Albumin (BSA) and blocked for 30  
224 minutes at room temperature in 10% donkey serum (all from Merck). Samples were stained overnight  
225 at 4°C with the primary antibodies, followed by the appropriate secondary antibodies (1 h incubation at  
226 room temperature). Immunofluorescent primary and secondary antibodies were listed in Table S3.  
227 Nuclei were counterstained with 10 µg/mL Hoechst (33342; Thermo Fisher Scientific). Analyses were  
228 assessed using the Nikon Eclipse Ti Microscope or the Nikon Eclipse Ti A1R Configured Confocal  
229 Microscope, with appropriate NIS-Elements Software (all from Nikon).

230

#### 231 *Mitochondria and cytoplasmic fractionation*

232 Mitochondrial and cytoplasmic separation was performed using the Mitochondrial Isolation Kit for  
233 Cultured Cells (Thermo Fisher Scientific), according to the manufacturer's instructions with minor  
234 modifications. To obtain a more purified mitochondrial fraction (with a more than 50% reduction of the  
235 lysosomal and peroxisomal contaminants), the post-cell debris supernatant was subjected to an extra  
236 centrifuge step at 3000 x g for 15 minutes. For Western blot analysis, mitochondrial pellets were lysed  
237 with 2% CHAPS (Merck) in Tris-buffered saline (TBS; containing 25 mM Tris, 0.15 M NaCl; pH 7.2) and  
238 subsequently centrifuged at high speed for 2 minutes. Western blot analysis was performed on the  
239 supernatant, containing soluble mitochondrial protein.

240

#### 241 *Western blot analysis*

242 Western blot analysis for cell lysates was performed in RIPA buffer supplemented with 10 mM NaF, 0.5  
243 mM Na<sub>3</sub>VO<sub>4</sub>, 1:100 protease inhibitor cocktail and 1 mM Phenylmethylsulfonyl Fluoride (PMSF; all from  
244 Merck). Equal amounts of protein (40 µg) were heat-denatured at 95°C in sample-loading buffer (50  
245 mM Tris-HCl, 100 mM DTT, 2% SDS, 0.1% bromophenol blue and 10% glycerol; pH 6.8), resolved by  
246 SDS-polyacrylamide gel electrophoresis and subsequently transferred to nitrocellulose membranes  
247 (Amersham Protran Western Blotting Membranes; Merck). The filters were blocked with TBS containing  
248 0.05% Tween and 5% non-fat dry milk (Merck). Incubation was done overnight with the indicated primary  
249 antibody dilutions, as listed in Table S2. Horseradish peroxidase-conjugated secondary antibodies (Bio-  
250 Rad) were diluted 1:5,000 in TBS-Tween (0.05%) with 2.5% non-fat dry milk. After incubation with  
251 SuperSignal Pico or Femto chemiluminescence substrate (both from Thermo Fisher Scientific), the  
252 polypeptide bands were detected with GelDoc Chemiluminescence Detection System (Bio-Rad).  
253 Quantification of relative densitometry was obtained by normalizing to the background and to loading  
254 control proteins (ACTB, from Cell Signaling Technology) using Image Lab Software (Bio-Rad).

255

#### 256 *Patch-clamp electrophysiology and Ca<sup>2+</sup> recordings*

257 Single cells were seeded on Matrigel-coated coverslips. Cells were perfused at 37°C with a solution  
258 containing the following (in mM): 137 NaCl, 5.4 KCl, 1.8 CaCl<sub>2</sub>, 0.5 MgCl<sub>2</sub>, 10 glucose and 10 Na-  
259 HEPES. The pH was adjusted to 7.4 with NaOH. The patch-clamp pipettes were filled with a solution  
260 containing the following (in mM): 120 K-Asp, 20 KCl, 10 HEPES, 5 Mg-ATP, 10 NaCl and 0.05 K<sub>s</sub>Fluo-  
261 4. The pH was adjusted to 7.2 with KOH. Patch electrode resistances were between 2.5 and 3 MΩ when  
262 the pipettes were filled with intracellular solution. Cells were patched in the whole-cell configuration.  
263 Data were recorded using an Axopatch 200B amplifier (Axon Instruments) at a sampling rate of 10 kHz.  
264 Signals were filtered with 5 kHz low-pass Bessel filters. APs were recorded in current-clamp mode, and  
265 if not spontaneous, after a 5 ms pulse of 0.5 nA at a 1 Hz frequency. Ca<sup>2+</sup> currents were measured in  
266 voltage-clamp mode. After a Na<sup>+</sup> current inactivation step from -70 mV to 40 mV for 750 ms, Ca<sup>2+</sup>  
267 currents were recorded with 10 mV voltage steps from -40 mV to 60 mV during 205 ms. For analysis,  
268 the maximum amplitude of the Ca<sup>2+</sup> current was measured and corrected for the cell capacitance. Data  
269 were analyzed with Clampfit Software (Axon Instruments).

270

271 *Contractility measurements of 3D EHT constructs*

272 The contractile properties of 3D EHTs were monitored by measuring the deflection distances of the  
273 microposts of the EHT device (in  $\mu\text{m}$ ) during spontaneous contraction and relaxation under temperature-  
274 controlled conditions ( $37^\circ\text{C}$ ) in oxygenated Tyrode's solution (in mM; containing 137 NaCl, 5.4 KCl, 0.5  
275  $\text{MgCl}_2$ , 12.8 HEPES and 5.5 Glucose; dissolved in deionized sterile water at pH 7.4) with  $\text{Ca}^{2+}$ . A  $\text{Ca}^{2+}$   
276 concentration of 1.8 mM was used to mimic physiological conditions. EHT constructs for contractility  
277 measurements were generated from 8-day-old hiPSC-CMs and monitored after 5 days of EHT  
278 maturation.

279  
280 *ATP luminescence detection*

281 The levels of cellular ATP were measured using the Luminescent ATP Detection Assay Kit (Abcam),  
282 according to the manufacturer's instructions. The Luminescent ATP Detection Assay Kit is based on the  
283 production of light caused by the reaction of ATP with added firefly's luciferase and luciferin. The ATP  
284 concentration is proportional to the emitted light. Briefly, hiPSC-CMs (20,000 cells per well in 100  $\mu\text{L}$   
285 volume) were seeded in a 96-well white microplate. Next day, 50  $\mu\text{L}$  of cell lysis solution was added to  
286 each well and the plate rotated for 5 minutes using an orbital shaker at 700 rpm to lyse cells and stabilize  
287 ATP. The plate was kept in the dark for 10 minutes and recordings were performed with the EG&G  
288 Berthold Microplate Luminometer LB 96V and corresponding software (Berthold Technologies)  
289 (Shanmugasundaram et al., 2017).

290  
291 *Measurements of NADPH-dependent ROS production*

292 The Colorimetric NADPH Assay Kit (Abcam) provides a convenient method for detecting NADPH in  
293 contrast to the traditional NAD/NADH and NADP/NADPH assays (which monitor the changes in NADH  
294 or NADPH absorption at 340 nm, suffering low sensitivity and high interference) (Griendling et al., 2016).  
295 Here, the NADPH probe is a chromogenic sensor that has its maximum absorbance at 460 nm upon  
296 NADPH reduction. The absorption of the NADPH probe is directly proportional to the concentration of  
297 NADPH. NADPH-dependent ROS production was measured in the presence or absence of 2.5 or 5.0  
298 mM ATP (preincubated for 60 minutes) in the total CM fraction or isolated mitochondrial fraction,  
299 according to the manufacturer's instructions. Briefly, hiPSC-CMs (20,000 cells per well in 100  $\mu\text{L}$   
300 volume) were seeded in a 96-well black microplate with clear flat bottoms. NADPH probe was added to  
301 samples and incubated for 30 minutes and protected from light. Recordings were performed with the  
302 ELx808 Absorbance Microplate Reader with absorbance measurements at 460 nm and quantified using  
303 Gen5 Software Version 3 (both from BioTek Instruments) (Sambon et al., 2020).

304  
305 *Statistical analysis*

306 Data were statistically analyzed using Prism Software Version 8 (GraphPad). All data were reported as  
307 mean  $\pm$  standard error of the mean (SEM). Differences between two groups were examined for statistical  
308 significance using Student's t-test. One-Way or Two-Way ANOVA (with multiple comparisons test and  
309 Tukey's or Bonferroni's correction) were used for three or more groups. Significance of the difference  
310 was indicated as follows: \* $p < 0.05$ ; \*\* $p < 0.01$ ; \*\*\* $p < 0.001$  and \*\*\*\* $p < 0.0001$ .

311 **SUPPLEMENTAL REFERENCES**

312  
313 Coll, M., Perea, L., Boon, R., Leite, S.B., Vallverdu, J., Mannaerts, I., Smout, A., El Taghdouini, A.,  
314 Blaya, D., Rodrigo-Torres, D., et al. (2018). Generation of Hepatic Stellate Cells from Human Pluripotent  
315 Stem Cells Enables In Vitro Modeling of Liver Fibrosis. *Cell Stem Cell* 23, 101-113 e107.  
316 10.1016/j.stem.2018.05.027.  
317 Griendling, K.K., Touyz, R.M., Zweier, J.L., Dikalov, S., Chilian, W., Chen, Y.R., Harrison, D.G.,  
318 Bhatnagar, A., and American Heart Association Council on Basic Cardiovascular, S. (2016).  
319 Measurement of Reactive Oxygen Species, Reactive Nitrogen Species, and Redox-Dependent  
320 Signaling in the Cardiovascular System: A Scientific Statement From the American Heart Association.  
321 *Circ Res* 119, e39-75. 10.1161/RES.000000000000110.  
322 Patel, A.M., Wierda, K., Thorrez, L., van Putten, M., De Smedt, J., Ribeiro, L., Tricot, T., Gajjar, M.,  
323 Duelen, R., Van Damme, P., et al. (2019). Dystrophin deficiency leads to dysfunctional glutamate  
324 clearance in iPSC derived astrocytes. *Transl Psychiatry* 9, 200. 10.1038/s41398-019-0535-1.  
325 Ran, F.A., Hsu, P.D., Wright, J., Agarwala, V., Scott, D.A., and Zhang, F. (2013). Genome engineering  
326 using the CRISPR-Cas9 system. *Nat Protoc* 8, 2281-2308. 10.1038/nprot.2013.143.  
327 Rauch, C., Feifel, E., Kern, G., Murphy, C., Meier, F., Parson, W., Beilmann, M., Jennings, P.,  
328 Gstraunthaler, G., and Wilmes, A. (2018). Differentiation of human iPSCs into functional podocytes.  
329 *PLoS One* 13, e0203869. 10.1371/journal.pone.0203869.  
330 Sambon, M., Gorlova, A., Demelonne, A., Alhama-Riba, J., Coumans, B., Lakaye, B., Wins, P., Fillet,  
331 M., Anthony, D.C., Strelakova, T., and Bettendorff, L. (2020). Dibenzoylthiamine Has Powerful  
332 Antioxidant and Anti-Inflammatory Properties in Cultured Cells and in Mouse Models of Stress and  
333 Neurodegeneration. *Biomedicines* 8. 10.3390/biomedicines8090361.  
334 Shanmugasundaram, K., Nayak, B.K., Friedrichs, W.E., Kaushik, D., Rodriguez, R., and Block, K.  
335 (2017). NOX4 functions as a mitochondrial energetic sensor coupling cancer metabolic reprogramming  
336 to drug resistance. *Nat Commun* 8, 997. 10.1038/s41467-017-01106-1.
